# Supplementary material for: TIMELESS is a Potential Molecular Marker in Glioma: A Study Based on Multiple Databases and Methods
Source: Research Square preprint supplement (doi:10.21203/rs.3.rs-132735/v1), 2020-12-23
Supplement: Supplementary file 1 [file 2ffddd77dd8bf215639dbe87.docx]

**Table S3** Characteristics of patients with glioma based on TCGA RNA-seq data.

| Characteristics |  | Number of cases | Percentages (%) |
| --- | --- | --- | --- |
| Gender | Male | 377 | 57.73 |
|  | Female | 276 | 42.27 |
| Age | <=51 | 394 | 60.34 |
|  | >51 | 259 | 39.66 |
| Grade | WHO II | 238 | 36.45 |
|  | WHO III | 256 | 39.20 |
|  | WHO IV | 159 | 24.35 |
